# Supplementary material for: The Microbial Nitrogen Cycling, Bacterial Community Composition, and Functional Potential in a Natural Grassland Are Stable from Breaking Dormancy to Being Dormant Again
Source: MDPI journal article supplement (doi:10.3390/microorganisms10050923), 2022-04-28
Supplement: s1 [file s1]

# Supplemental

## Supplemental figures

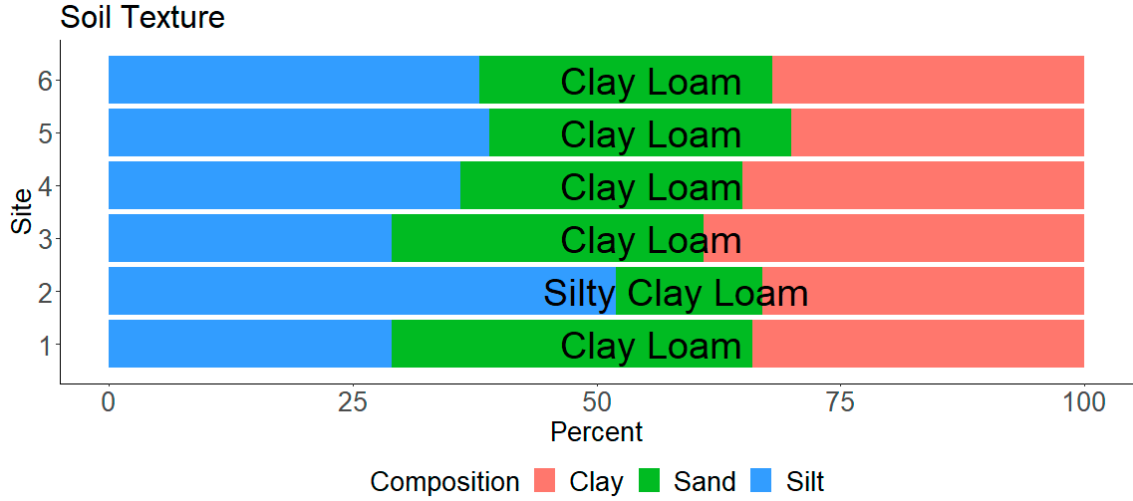

Figure S1: Soil textures of the sampling sites

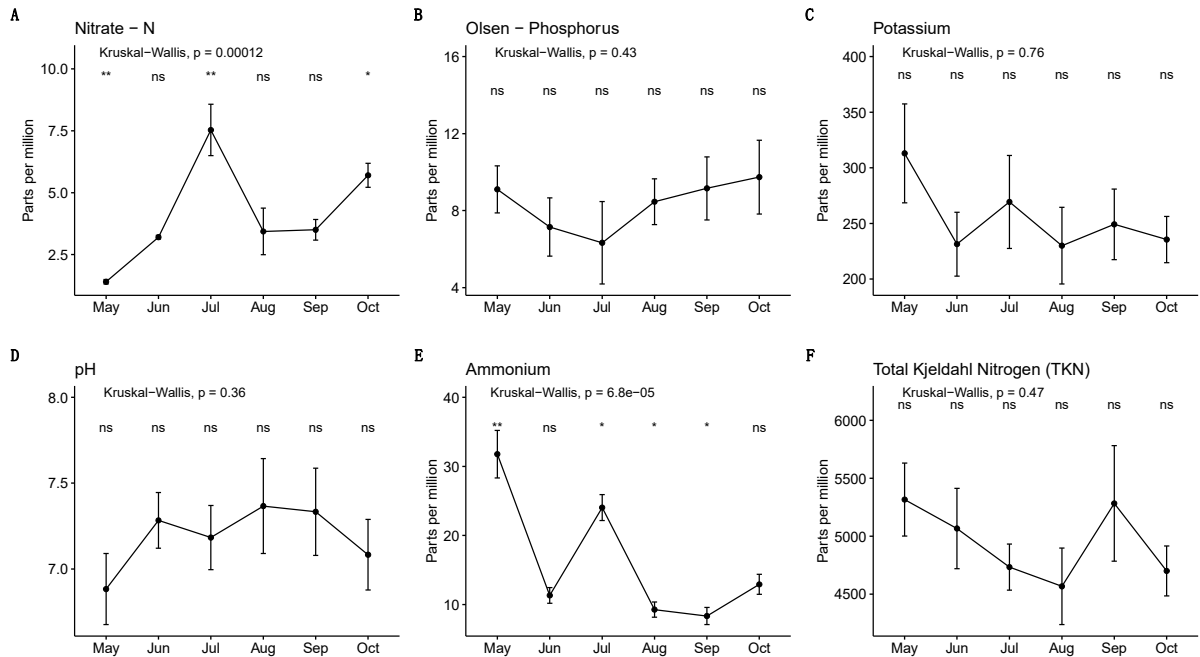

Figure S2: Soil chemical properties across sampling sites within the sampling time points with Kruskal-Wallis test results.



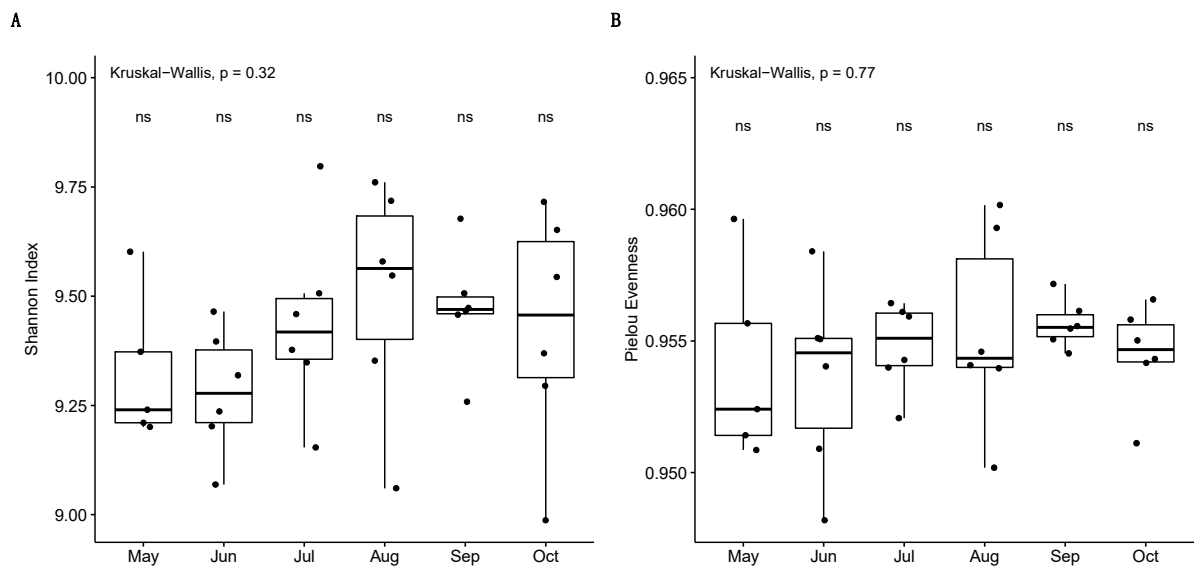

**Figure S5.** Alpha-diversity of the bacterial communities across 6 months (a) Shannon diversity, and (b) Pielou Evenness.

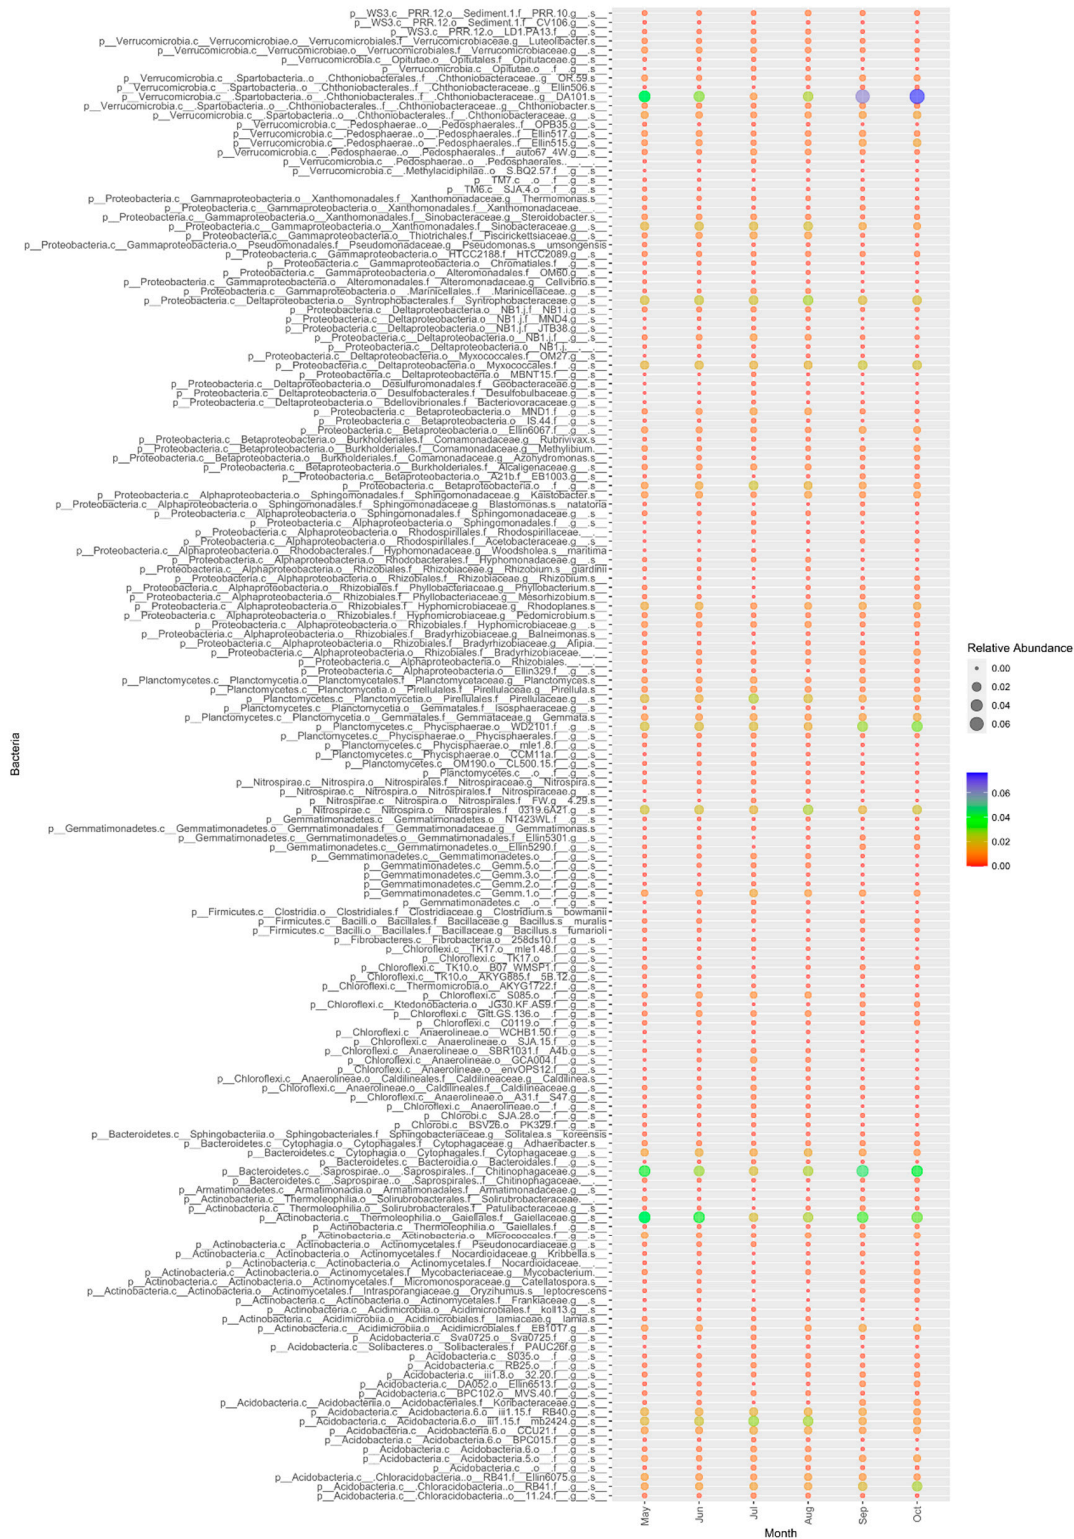

**Figure S6:** Taxa different across at least one time point across the seasons ( $p < 0.01$ ). The names of the phyla shown here are based on the taxonomic profile downloaded from the Greengenes database, however, some of the phylum names have recently been changed (Oren & Garrity, 2011).

## Supplemental tables

Table S1. G-Block solutions

| S.No. | Target  | Type   | S.No. | Target | Type    |
|-------|---------|--------|-------|--------|---------|
| 1     | Bac_16S | gBlock | 16    | hzs    | gBlock  |
| 2     | Arc_16S | gBlock | 17    | hao    | gBlock  |
| 3     | nirK_1  | gBlock | 18    | hzo    | gBlock  |
| 4     | nirK_2  | gBlock | 19    | amoA_1 | gBlock  |
| 5     | nirS_1  | gBlock | 20    | amoA_2 | gBlock  |
| 6     | norB_1  | gBlock | 21    | amoA_3 | gBlock  |
| 7     | nosZ_1  | gBlock | 22    | amoA_4 | gBlock  |
| 8     | nosZ_2  | gBlock | 23    | amoA_5 | gBlock  |
| 9     | narG_2  | gBlock | 24    | amoA_6 | gBlock  |
| 10    | norB_2  | gBlock | 25    | nirK_3 | gBlock  |
| 11    | napA    | gBlock | 26    | nirS_2 | gBlock  |
| 12    | nrfA    | gBlock | 27    | nirS_3 | gBlock  |
| 13    | nifH    | gBlock | 28    | narG_1 | plasmid |
| 14    | nxB_1   | gBlock | 29    | nosZ_3 | plasmid |
| 15    | nxB_2   | gBlock | 30    | comaA  | gBlock  |

Table S2. Primers used for nitrogen cycle genes

| Gene          | Organism                 | Forward      | Reverse       | Assay No. | Assay ID    |
|---------------|--------------------------|--------------|---------------|-----------|-------------|
| 16S rRNA gene | Bacteria                 | 515F         | 806R          | 1         | 1_16S       |
|               | Archaea                  | Archaea-F KO | Archaea-R KO  | 2         | 2_Arch_16S  |
| <i>amoA</i>   | $\gamma$ -proteobacteria | Gamo172 F1   | Gamo172 F1_R1 | 3         | 3_Gamo_F1R1 |
|               |                          | Gamo172 F1   | Gamo172 F1_R2 | 4         | 4_Gamo_F1R2 |
|               |                          | Gamo172 F2   | Gamo172 F2_R1 | 5         | 5_Gamo_F2R1 |
| <i>amoA</i>   | $\beta$ -proteobacteria  | amoA_F1      | amoA_2R       | 6         | 6_amoA      |

| Gene           | Organism              | Forward       | Reverse       | Assay No. | Assay ID         |
|----------------|-----------------------|---------------|---------------|-----------|------------------|
|                | Archaea               | Arch-amoAF    | Arch-amoAR    | 7         | 7_Arch_amoAF     |
|                |                       | Arch-amoAFA   | Arch-amoAR    | 8         | 8_Arch_amoAF A   |
|                |                       | Arch-amoAFB   | Arch-amoAR    | 9         | 9_Arch_amoAF B   |
|                |                       | Arch-amoA-for | Arch-amoA-rev | 10        | 10_Arch_amoA-for |
| <i>hao/hdh</i> | anammox bacteria      | hzocl1F1      | hzocl1R2      | 11        | 11_hzocl         |
|                | Proteobacterial AOB   | haoF4         | haoR2         | 12        | 12_hao           |
| <i>hzs</i>     | anammox bacteria      | hzsA_1597F    | hzsA1857R     | 13        | 13_hzsA          |
| <i>nxrB</i>    | Nitrobacter           | NxrB 1F       | NxrB 1R       | 14        | 14_nxrBF         |
|                | Nitrospira            | nxrB169f      | nxrB638r      | 15        | 15_nxrB169f      |
| <i>narG</i>    | Bacteria              | W9F           | T38R          | 16        | 16_narG_W9F      |
|                |                       | narG1960f     | narG2650r     | 17        | 17_narG_1960f    |
| <i>nrfA</i>    | Bacteria              | nrfAF2aw      | nrfAR1        | 18        | 18_nrfA          |
| <i>napA</i>    | Bacteria              | V66           | V67           | 19        | 19_napA_V66      |
|                |                       | V17m          | napA4r        | 20        | 20_napA_V17m     |
| <i>nirS</i>    | Bacteria              | nirSCd3aF     | nirSR3cd      | 21        | 21_nirS_cd3aF    |
|                |                       | nirSC1F       | nirSC1R       | 22        | 22_nirSC1F       |
|                |                       | nirSC2F       | nirSC2R       | 23        | 23_nirSC2F       |
|                |                       | nirSC3F       | nirSC3R       | 24        | 23_nirSC3F       |
| <i>nirK</i>    | Bacteria              | FlaCu         | R3Cu          | 25        | 25_nirK_FlaCu    |
|                |                       | nirK876       | nirK1040      | 26        | 26_nirK876       |
|                |                       | nirKC1F       | nirKC1R       | 27        | 27_nirKC1F       |
|                |                       | nirKC2F       | nirKC2R       | 28        | 28_nirKC2F       |
|                |                       | nirKC4F       | nirKC4R       | 29        | 29_nirKC4F       |
|                | AOB                   | nirK_166F     | nirK_665R     | 30        | 30_nirK_166F     |
| <i>norB</i>    | denitrifier           | norB2         | norB6         | 31        | 31_norB2         |
|                |                       | cnorB-2F      | cnorB-6R      | 32        | 32_cnorB-2F      |
|                | Bacteria              | qnorB2F       | qnorB5R       | 33        | 33_qnorB2F-5R    |
|                |                       | qnorB2F       | qnorB7R       | 34        | 34_qnorB2F-7R    |
| <i>nosZ</i>    | denitrifier, clade I  | nosZ1F        | nosZ1R        | 35        | 35_nosZ1F        |
|                |                       | nosZ-F-1181   | nosZ-R-1880   | 36        | 36_nosZ-F-1181   |
|                | denitrifier, clade II | nosZ-II-F     | nosZ-II-R     | 37        | 37_nosZ-II-F     |
|                |                       | NosZ912F      | NosZ1853R     | 38        | 38_nosZ912F      |
| <i>nifH</i>    | Bacteria              | nifHF         | nifHR         | 39        | 39_nifHF         |
|                |                       | IGK3          | DVV_correct   | 40        | 40_nifH_IGK3     |
| <i>comaA</i>   | comammox              | comaA-244F    | comaA-659R    | 41        | 41_comaA-244F    |
